# Supplementary material for: Structural properties of trans hydrido–hydroxo M(H)(OH)(NH2CMe2CMe2NH2)(PPh3)2 (M = Ru, Os) complexes and their proton exchange behaviour with water in solution
Source: Royal Society of Chemistry journal article supplement (doi:10.1039/c3dt50452b), 2013-01-01
Supplement: c3dt50452b.pdf [file c3dt50452b.pdf]

**Supporting information for: Structural Properties of**  
***Trans* Hydrido-Hydroxo**  
**M(H)(OH)(NH<sub>2</sub>CMe<sub>2</sub>CMe<sub>2</sub>NH<sub>2</sub>)(PPh<sub>3</sub>)<sub>2</sub> (M = Ru, Os)**  
**Complexes and their Proton Exchange Behaviour**  
**with Water in Solution**

Demyan E. Prokopchuk, Alba Collado, Alan J. Lough, and Robert H. Morris\*

*Department of Chemistry, University of Toronto, 80 St. George Street, Toronto, ON, M5S3H6,  
Canada*

E-mail: rmorris@chem.utoronto.ca

---

\*To whom correspondence should be addressed

Table 1: X-Ray crystal structure and refinement data for complexes **3Ru** and **3Os**.

| Compounds                                                        | <b>3Ru</b>                                                                      | <b>3Os</b>                                                                      |
|------------------------------------------------------------------|---------------------------------------------------------------------------------|---------------------------------------------------------------------------------|
| Empirical formula                                                | C <sub>42</sub> H <sub>50</sub> N <sub>2</sub> O <sub>2</sub> P <sub>2</sub> Ru | C <sub>42</sub> H <sub>50</sub> N <sub>2</sub> O <sub>2</sub> P <sub>2</sub> Os |
| Formula mass                                                     | 777.85                                                                          | 866.98                                                                          |
| Temperature (K)                                                  | 150(2)                                                                          | 150(1)                                                                          |
| Wavelength (Å)                                                   | 0.71073                                                                         | 0.71073                                                                         |
| Crystal system                                                   | Monoclinic                                                                      | Monoclinic                                                                      |
| Space group                                                      | <i>P</i> 2 <sub>1</sub> / <i>n</i>                                              | <i>P</i> 2 <sub>1</sub> / <i>n</i>                                              |
| <i>a</i> (Å)                                                     | 13.9422(4)                                                                      | 13.9210(3)                                                                      |
| <i>b</i> (Å)                                                     | 15.7847(2)                                                                      | 15.8226(4)                                                                      |
| <i>c</i> (Å)                                                     | 16.9683(4)                                                                      | 16.9605(6)                                                                      |
| $\alpha$ (°)                                                     | 90                                                                              | 90                                                                              |
| $\beta$ (°)                                                      | 94.2440(9)                                                                      | 94.033(2)                                                                       |
| $\gamma$ (°)                                                     | 90                                                                              | 90                                                                              |
| Volume (Å <sup>3</sup> )                                         | 3724.0(2)                                                                       | 3726.5(2)                                                                       |
| <i>Z</i>                                                         | 4                                                                               | 4                                                                               |
| Density (calculated, g/cm <sup>3</sup> )                         | 1.387                                                                           | 1.545                                                                           |
| Absorption Coefficient (mm <sup>-1</sup> )                       | 0.545                                                                           | 3.546                                                                           |
| F(000)                                                           | 1624                                                                            | 1752                                                                            |
| Crystal Size (mm <sup>3</sup> )                                  | 0.14 × 0.12 × 0.06                                                              | 0.10 × 0.10 × 0.10                                                              |
| Theta range for data collection (°)                              | 2.73–27.56                                                                      | 2.57–27.55                                                                      |
| Reflections collected                                            | 20367                                                                           | 34052                                                                           |
| Independent reflections                                          | 8073 [ <i>R</i> ( <i>int</i> ) = 0.0473]                                        | 8502 [ <i>R</i> ( <i>int</i> ) = 0.0843]                                        |
| Completeness to $\theta = 25.00^\circ$ (%)                       | 98.0                                                                            | 98.9                                                                            |
| Absorption correction                                            | Multi-scan                                                                      | Multi-scan                                                                      |
| Max. and min. transmission                                       | 0.969, 0.882                                                                    | 0.712, 0.577                                                                    |
| Largest diff. peak and hole (e Å <sup>3</sup> )                  | 1.355, -1.163                                                                   | 3.258, -1.037                                                                   |
| Refinement method                                                | Full-matrix least-squares on <i>F</i> <sup>2</sup>                              | Full-matrix least-squares on <i>F</i> <sup>2</sup>                              |
| Data/restraints/parameters                                       | 8073/0/449                                                                      | 8502/0/449                                                                      |
| Goodness-of-fit on <i>F</i> <sup>2</sup>                         | 1.040                                                                           | 1.054                                                                           |
| Final <i>R</i> indices [ <i>I</i> > 2σ( <i>I</i> )] <sup>a</sup> | <i>R</i> <sub>1</sub> = 0.0461                                                  | <i>R</i> <sub>1</sub> = 0.0428                                                  |
| <i>R</i> indices (all data) <sup>b</sup>                         | <i>wR</i> <sub>2</sub> = 0.1268                                                 | <i>wR</i> <sub>2</sub> = 0.0974                                                 |

$${}^a R_1 = \frac{\sum(F_o - F_c)}{\sum(F_o)}$$

$${}^b wR_2 = \sqrt{\frac{\sum(w(F_o^2 - F_c^2)^2)}{\sum(w(F_o^2)^2)}}$$

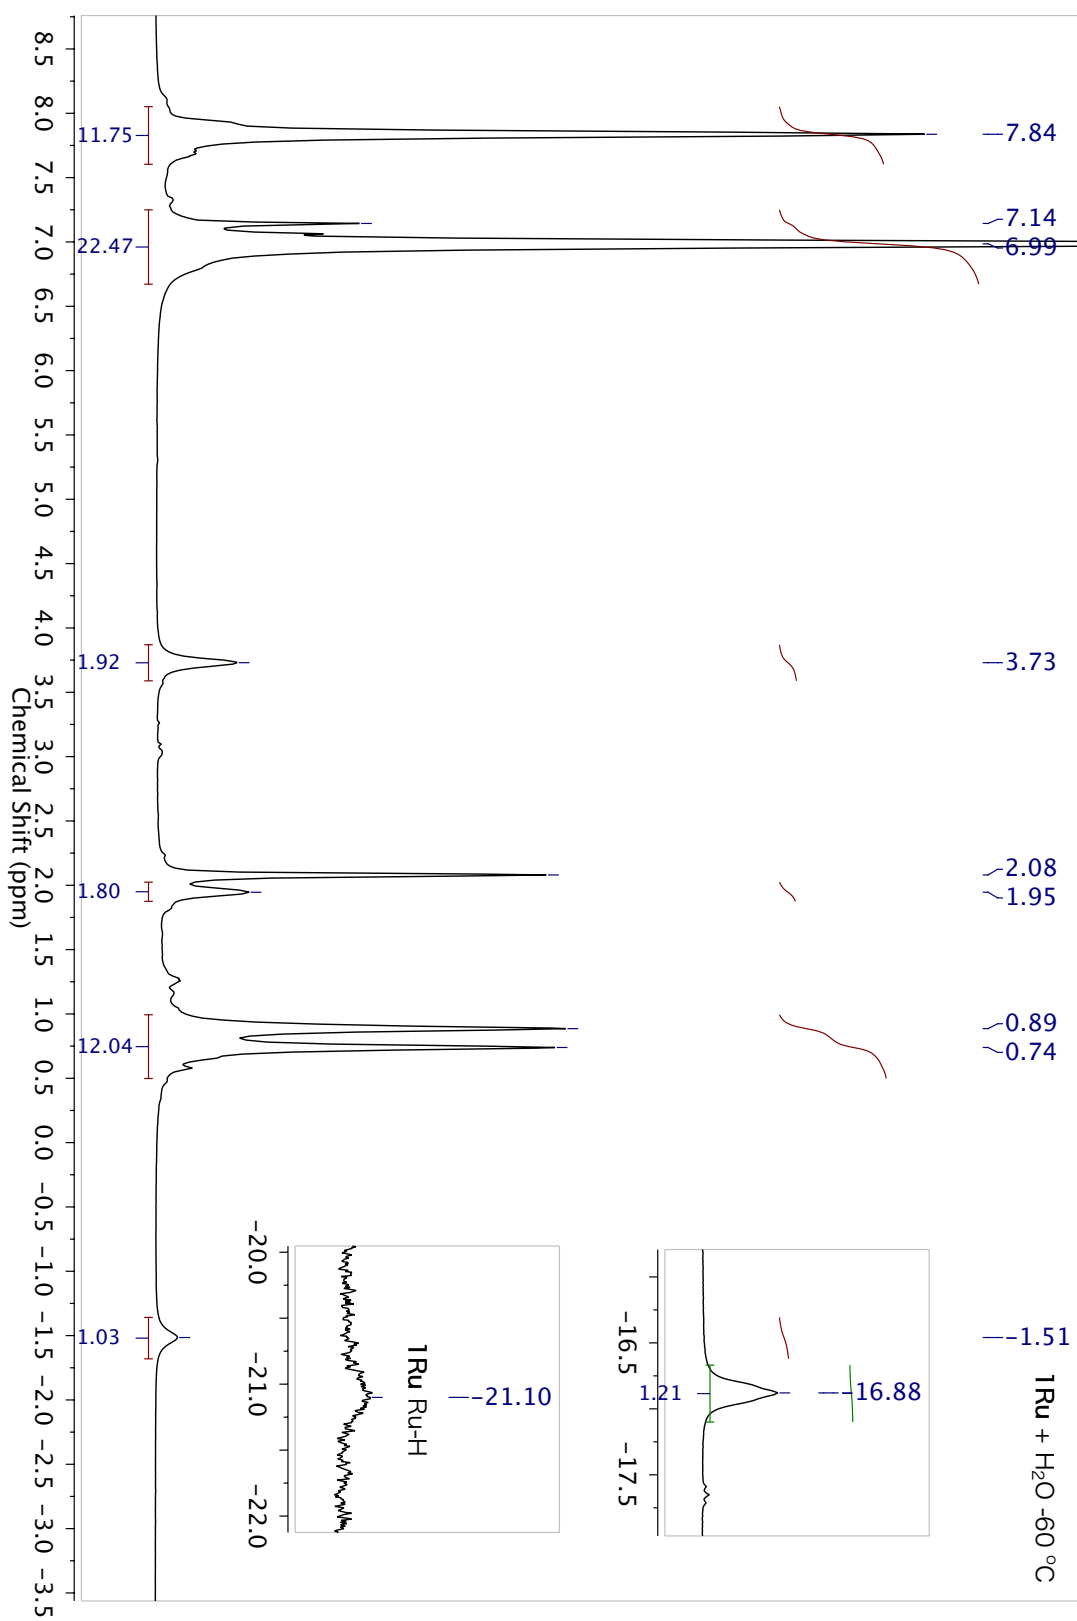

Figure 1:  $^1\text{H}$  NMR spectrum (400 MHz) of **1Ru** +  $\text{H}_2\text{O}$  at  $-60\text{ }^\circ\text{C}$  in  $\text{toluene-}d_8$ .

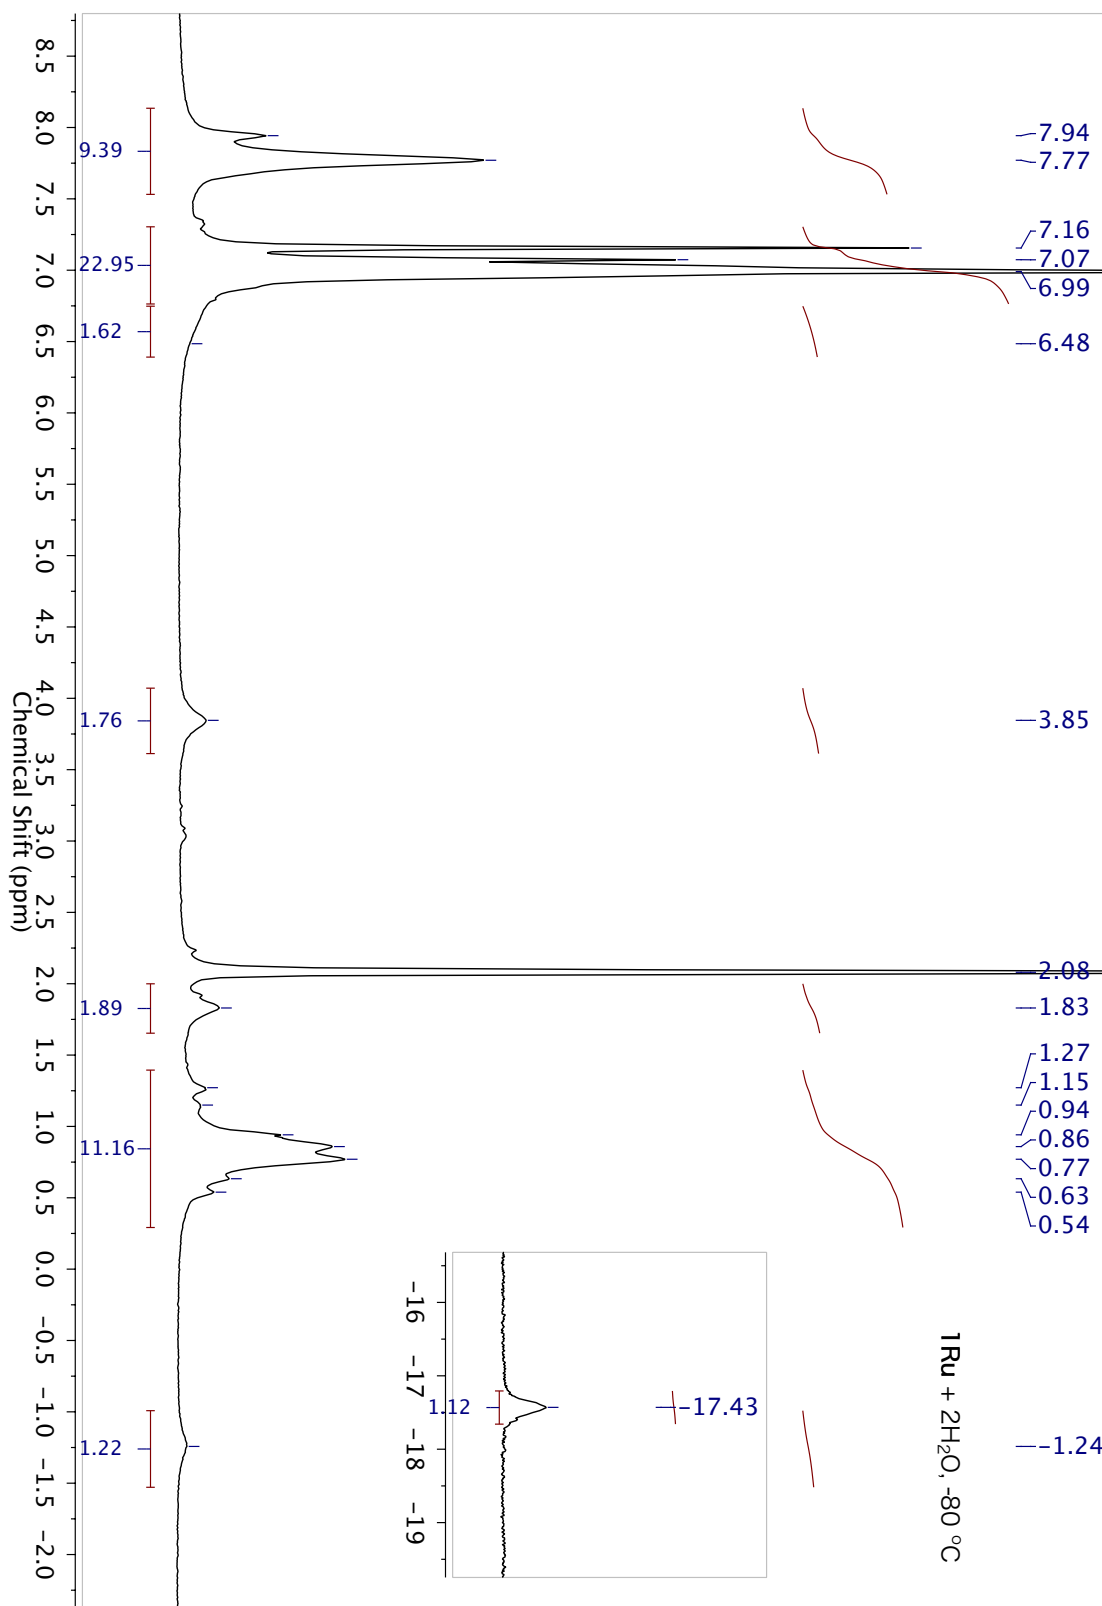

Figure 2:  $^1\text{H}$  NMR spectrum (400 MHz) of **1Ru** + 2  $\text{H}_2\text{O}$  at  $-80\text{ }^\circ\text{C}$  in toluene- $d_8$ .

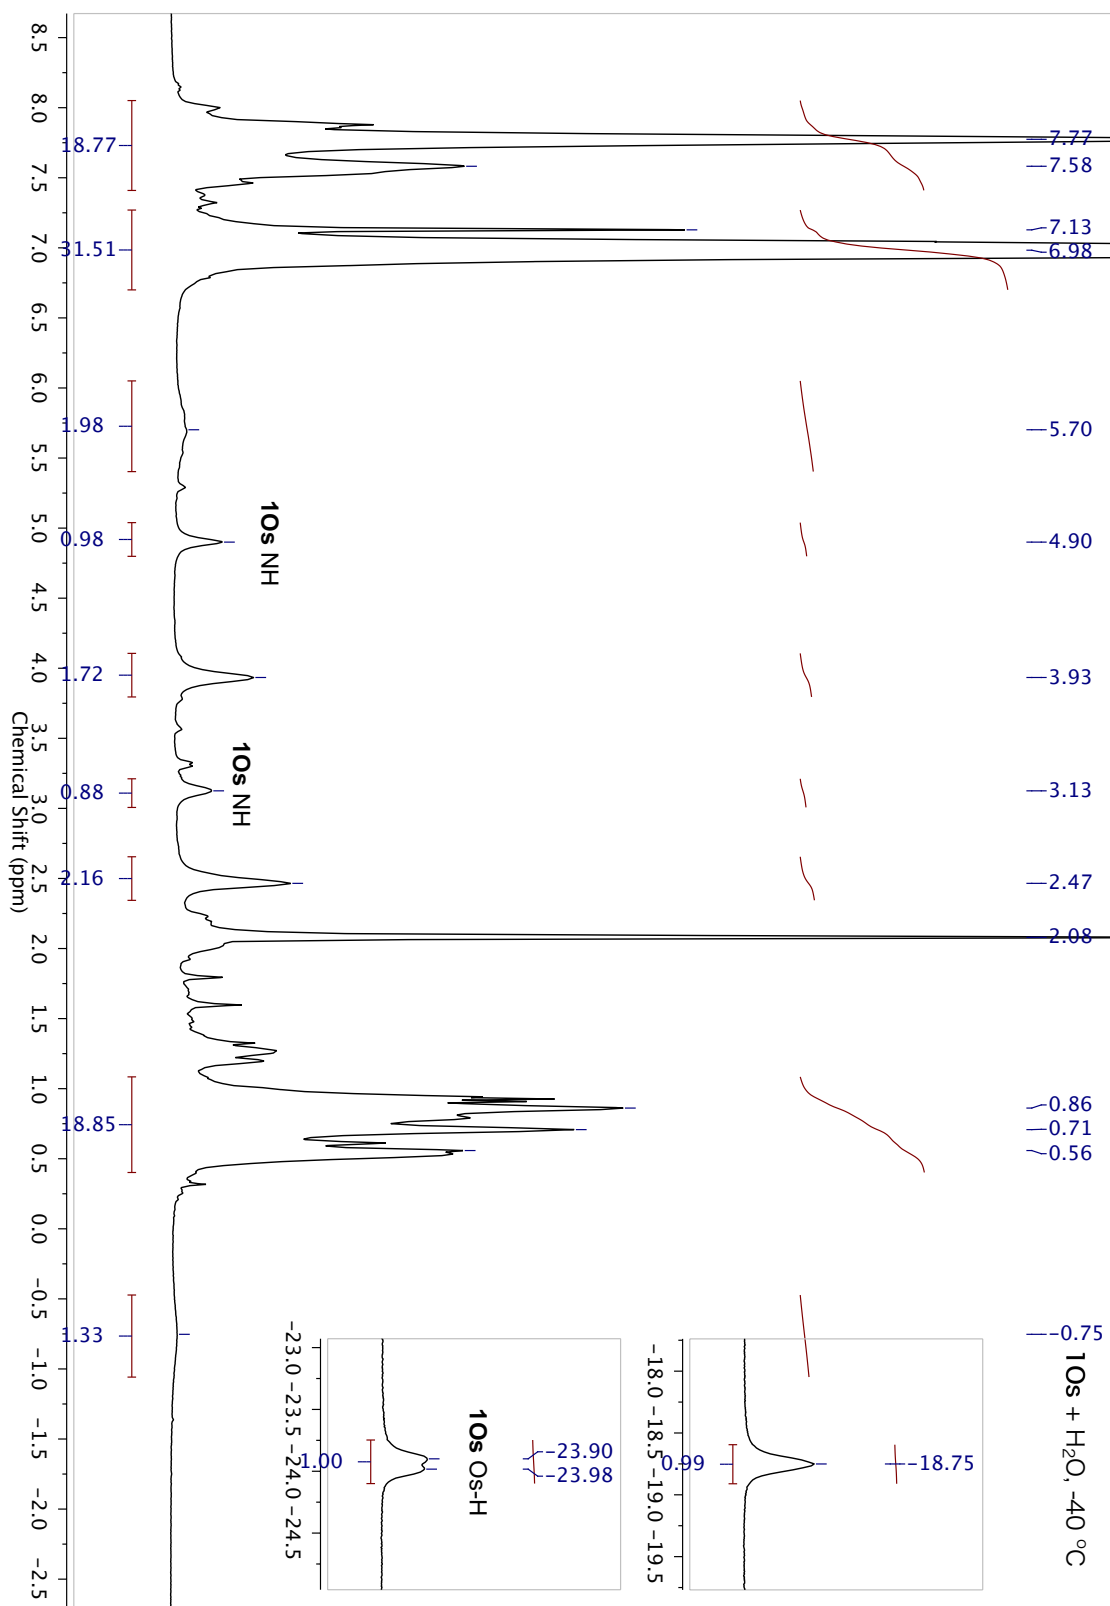

Figure 3:  $^1\text{H}$  NMR spectrum (400 MHz) of **10s** +  $\text{H}_2\text{O}$  at  $-40\text{ }^\circ\text{C}$  in  $\text{toluene-}d_8$ .

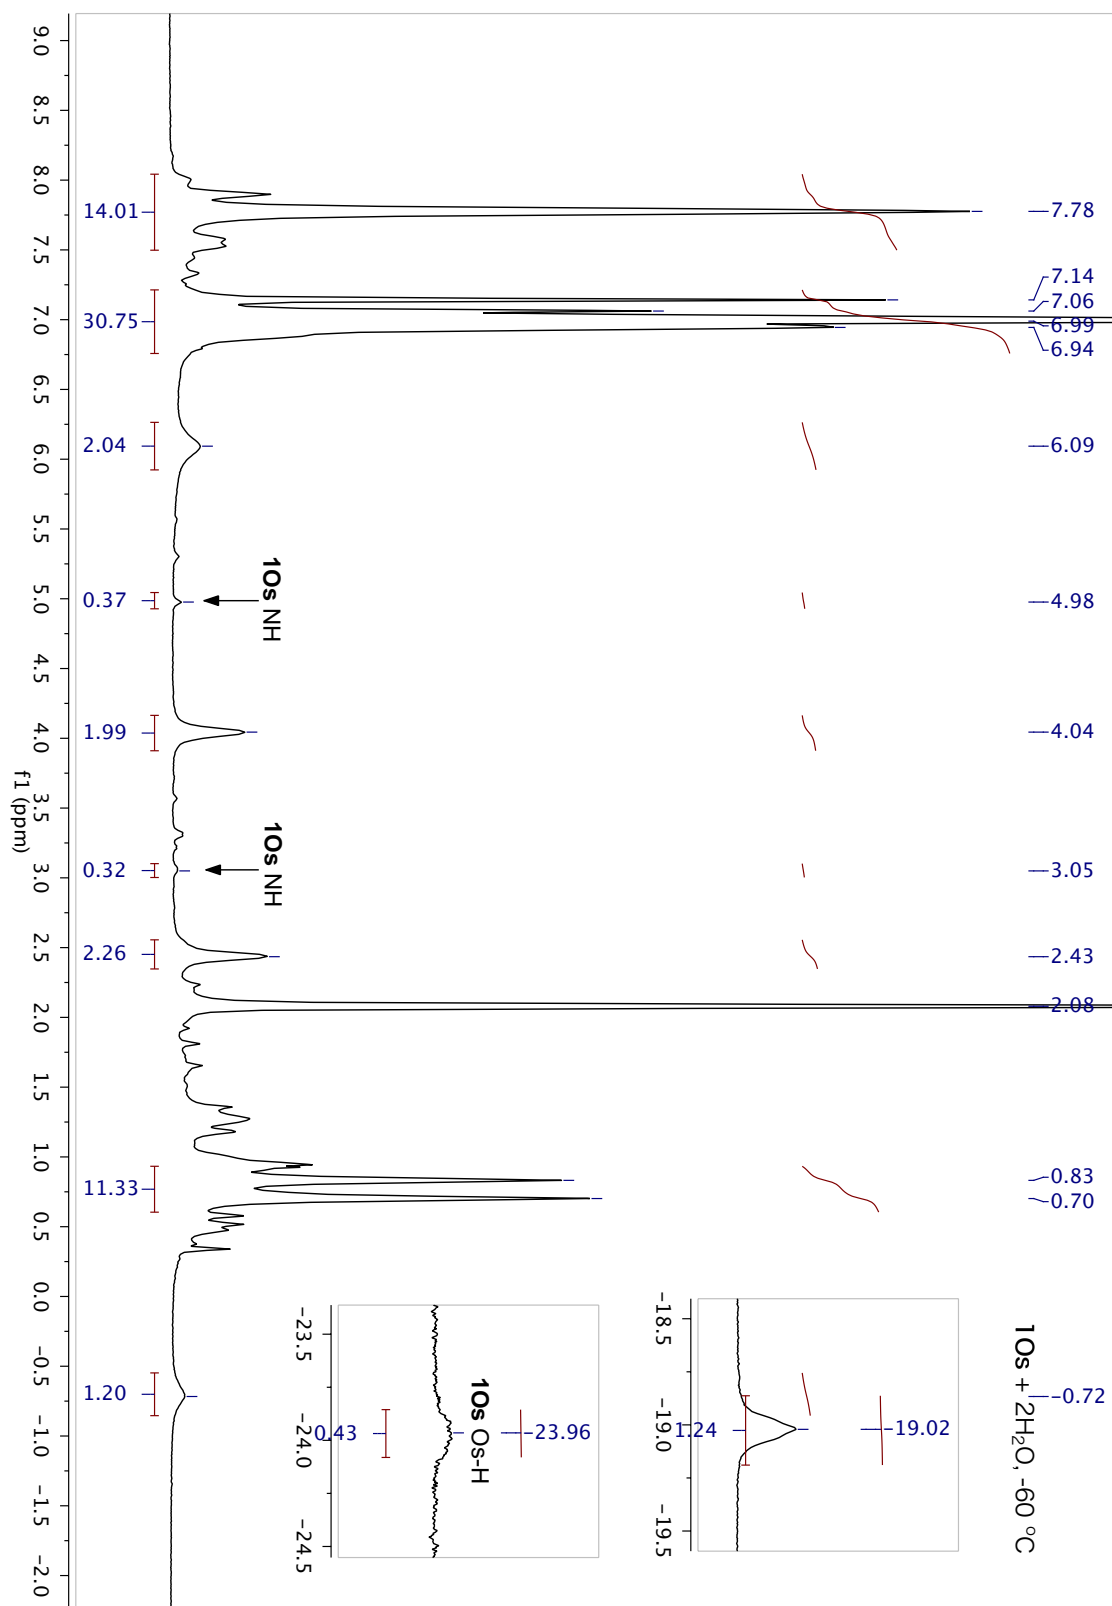

Figure 4:  $^1\text{H}$  NMR spectrum (400 MHz) of  $1\text{Os} + 2\text{H}_2\text{O}$  at  $-60\text{ }^\circ\text{C}$  in  $\text{toluene-}d_8$ .
